# Supplementary material for: Vitamin D receptor-binding site variants affect prostate cancer progression
Source: PubMed Central journal article supplement (PMC5650327; doi:10.18632/oncotarget.18271), 2017-05-26
Supplement: oncotarget-08-74119-s002.pdf [file oncotarget-08-74119-s002.pdf]

**Supplementary Table 1: Genotyped SNPs and the *P* values of their association with TTP in localized prostate cancer**

| SNP ID            | Chromosome | Position  | Additive     | Dominant     | Recessive    |
|-------------------|------------|-----------|--------------|--------------|--------------|
| rs10789077        | chr1       | 59743939  | 0.115        | 0.302        | -            |
| rs17414204        | chr1       | 81311994  | 0.726        | 0.927        | 0.050        |
| <b>rs316052</b>   | chr1       | 98724652  | 0.891        | 0.662        | <b>0.015</b> |
| rs17668726        | chr1       | 193646576 | 0.548        | 0.410        | -            |
| rs6673734         | chr1       | 214758060 | 0.532        | 0.216        | 0.350        |
| rs1490333         | chr1       | 216274592 | 0.677        | 0.753        | 0.705        |
| rs356992          | chr2       | 60607097  | 0.598        | 0.523        | 0.937        |
| rs950965          | chr2       | 66521813  | 0.288        | 0.589        | 0.168        |
| rs10198409        | chr2       | 156464481 | 0.271        | 0.350        | 0.401        |
| rs9863011         | chr3       | 87069510  | 0.978        | 0.866        | 0.713        |
| rs798580          | chr3       | 119992658 | 0.568        | 0.598        | 0.679        |
| rs1515372         | chr3       | 124376943 | 0.223        | 0.380        | 0.208        |
| rs12631628        | chr3       | 159660117 | 0.698        | 0.843        | 0.495        |
| rs10936548        | chr3       | 169204342 | 0.984        | 0.757        | 0.353        |
| rs11099242        | chr4       | 134606625 | 0.503        | 0.495        | 0.737        |
| rs10473995        | chr5       | 77548993  | 0.803        | 0.899        | 0.717        |
| rs6872228         | chr5       | 124368580 | 0.492        | 0.553        | 0.600        |
| rs10475856        | chr5       | 166968159 | 0.921        | 0.825        | 0.849        |
| <b>rs9393682</b>  | chr6       | 26165029  | <b>0.003</b> | <b>0.005</b> | <b>0.030</b> |
| rs10943438        | chr6       | 78066555  | 0.608        | 0.415        | 0.877        |
| rs2501639         | chr6       | 92576658  | 0.282        | 0.544        | 0.209        |
| <b>rs4499937</b>  | chr6       | 98599730  | 0.552        | 0.266        | <b>0.013</b> |
| rs17716922        | chr6       | 103953259 | 0.535        | 0.594        | 0.570        |
| rs1045530         | chr7       | 32874660  | 0.747        | 0.885        | 0.639        |
| rs3801232         | chr7       | 42219838  | 0.122        | 0.112        | 0.640        |
| rs9641549         | chr7       | 115134888 | 0.879        | 0.757        | 0.947        |
| <b>rs12671349</b> | chr7       | 132175098 | <b>0.031</b> | <b>0.030</b> | -            |
| <b>rs12532853</b> | chr7       | 146939689 | 0.123        | <b>0.013</b> | 0.107        |
| rs1378033         | chr8       | 14984517  | 0.722        | 0.430        | 0.372        |
| rs13252746        | chr8       | 78806369  | 0.632        | 0.800        | 0.209        |
| rs997694          | chr9       | 16474870  | 0.143        | 0.171        | 0.360        |
| rs1930040         | chr9       | 27928085  | 0.936        | 0.830        | 0.374        |
| rs6559417         | chr9       | 80662100  | 0.230        | 0.091        | 0.820        |
| rs9329292         | chr10      | 2537866   | 0.739        | 0.415        | 0.649        |
| rs11256715        | chr10      | 10712073  | 0.858        | 0.527        | 0.091        |
| rs10995850        | chr10      | 65683855  | 0.472        | 0.664        | -            |
| rs2394324         | chr10      | 68512374  | 0.276        | 0.694        | 0.152        |
| rs2574789         | chr10      | 78521348  | 0.140        | 0.317        | 0.093        |

|                  |       |           |       |       |              |
|------------------|-------|-----------|-------|-------|--------------|
| rs7074044        | chr10 | 124842905 | 0.354 | 0.375 | 0.607        |
| rs2387992        | chr10 | 130651786 | 0.806 | 0.651 | 0.868        |
| rs575050         | chr11 | 85017190  | 0.118 | 0.167 | 0.222        |
| rs2060756        | chr12 | 40395375  | 0.931 | 0.736 | 0.631        |
| rs1465057        | chr12 | 51899148  | 0.807 | 0.666 | 0.906        |
| rs7302357        | chr12 | 52281805  | 0.735 | 0.865 | 0.597        |
| rs2406254        | chr12 | 85616797  | 0.199 | 0.264 | 0.307        |
| rs9527770        | chr13 | 57660493  | 0.913 | 0.810 | 0.369        |
| rs17115183       | chr14 | 29207158  | 0.572 | 0.729 | -            |
| rs7151113        | chr14 | 33232896  | 0.511 | 0.226 | 0.226        |
| rs213560         | chr14 | 77707744  | 0.171 | 0.365 | -            |
| rs8032707        | chr15 | 35572205  | 0.166 | 0.104 | 0.711        |
| rs2291278        | chr15 | 69902105  | 0.386 | 0.210 | 0.684        |
| rs1834212        | chr15 | 93876557  | 0.293 | 0.194 | -            |
| rs716820         | chr17 | 47985581  | 0.425 | 0.425 | 0.651        |
| rs7238440        | chr18 | 21364727  | 0.457 | 0.662 | 0.344        |
| <b>rs7226824</b> | chr18 | 25930825  | 0.648 | 0.266 | <b>0.039</b> |
| rs2426477        | chr20 | 51300670  | 0.676 | 0.609 | 0.891        |
| rs7261371        | chr20 | 57431233  | 0.380 | 0.380 | -            |
| rs11088247       | chr21 | 33525119  | 0.204 | 0.624 | 0.083        |
| rs6640615        | chrX  | 10107276  | 0.652 |       |              |
| rs1060063        | chrX  | 40350760  | 0.989 |       |              |
| rs3747440        | chrX  | 133134250 | 0.649 |       |              |
| rs306885         | chrX  | 154651506 | 0.931 |       |              |

---

*P* values for log-rank test

-, not calculated because the frequency of the rare homozygote was below 0.05

*P* < 0.05 is in boldface
