# Supplementary material for: Vitamin D receptor-binding site variants affect prostate cancer progression
Source: PubMed Central journal article supplement (PMC5650327; doi:10.18632/oncotarget.18271), 2017-05-26
Supplement: oncotarget-08-74119-s003.pdf [file oncotarget-08-74119-s003.pdf]

**Supplementary Table 2: Genotyped SNPs and the *P* values of their association with TTP in advanced prostate cancer**

| SNP ID            | Chromosome | Position  | Additive     | Dominant     | Recessive    |
|-------------------|------------|-----------|--------------|--------------|--------------|
| rs10789077        | chr1       | 59743939  | 0.698        | 0.387        | -            |
| rs17414204        | chr1       | 81311994  | 0.221        | 0.465        | 0.052        |
| rs316052          | chr1       | 98724652  | 0.569        | 0.997        | 0.133        |
| rs17668726        | chr1       | 193646576 | 0.170        | 0.231        | -            |
| rs6673734         | chr1       | 214758060 | 0.576        | 0.680        | 0.580        |
| rs1490333         | chr1       | 216274592 | 0.087        | 0.358        | 0.050        |
| rs356992          | chr2       | 60607097  | 0.980        | 0.831        | 0.660        |
| rs950965          | chr2       | 66521813  | 0.660        | 0.822        | 0.581        |
| rs10198409        | chr2       | 156464481 | 0.783        | 0.403        | 0.303        |
| rs9863011         | chr3       | 87069510  | 0.326        | 0.169        | 0.974        |
| rs798580          | chr3       | 119992658 | 0.421        | 0.408        | 0.626        |
| rs1515372         | chr3       | 124376943 | 0.968        | 0.772        | 0.599        |
| rs12631628        | chr3       | 159660117 | 0.943        | 0.685        | 0.489        |
| rs10936548        | chr3       | 169204342 | 0.876        | 0.893        | 0.900        |
| rs11099242        | chr4       | 134606625 | 0.608        | 0.607        | 0.786        |
| rs10473995        | chr5       | 77548993  | 0.999        | 0.699        | 0.550        |
| rs6872228         | chr5       | 124368580 | 0.302        | 0.100        | 0.602        |
| rs10475856        | chr5       | 166968159 | 0.687        | 0.314        | 0.410        |
| rs9393682         | chr6       | 26165029  | 0.625        | 0.759        | 0.250        |
| rs10943438        | chr6       | 78066555  | 0.928        | 0.680        | 0.421        |
| rs2501639         | chr6       | 92576658  | 0.297        | 0.522        | 0.268        |
| <b>rs4499937</b>  | chr6       | 98599730  | <b>0.029</b> | <b>0.022</b> | 0.276        |
| rs17716922        | chr6       | 103953259 | 0.662        | 0.993        | 0.091        |
| rs1045530         | chr7       | 32874660  | 0.109        | 0.108        | 0.438        |
| rs3801232         | chr7       | 42219838  | 0.416        | 0.263        | 0.942        |
| rs9641549         | chr7       | 115134888 | 0.883        | 0.742        | 0.545        |
| rs12671349        | chr7       | 132175098 | 0.488        | 0.537        | -            |
| rs12532853        | chr7       | 146939689 | 0.754        | 0.845        | 0.719        |
| <b>rs1378033</b>  | chr8       | 14984517  | <b>0.032</b> | <b>0.018</b> | 0.649        |
| rs13252746        | chr8       | 78806369  | 0.682        | 0.915        | 0.206        |
| rs997694          | chr9       | 16474870  | 0.975        | 0.785        | 0.576        |
| rs1930040         | chr9       | 27928085  | 0.979        | 0.660        | 0.113        |
| rs6559417         | chr9       | 80662100  | 0.983        | 0.992        | 0.961        |
| rs9329292         | chr10      | 2537866   | 0.458        | 0.600        | 0.467        |
| <b>rs11256715</b> | chr10      | 10712073  | 0.388        | 0.774        | <b>0.039</b> |
| rs10995850        | chr10      | 65683855  | 0.769        | 0.791        | -            |
| rs2394324         | chr10      | 68512374  | 0.808        | 0.862        | 0.824        |
| rs2574789         | chr10      | 78521348  | 0.206        | 0.389        | 0.176        |

|                  |       |           |       |              |       |
|------------------|-------|-----------|-------|--------------|-------|
| rs7074044        | chr10 | 124842905 | 0.326 | 0.210        | 0.935 |
| rs2387992        | chr10 | 130651786 | 0.677 | 0.737        | 0.728 |
| rs575050         | chr11 | 85017190  | 0.468 | 0.499        | 0.628 |
| rs2060756        | chr12 | 40395375  | 0.788 | 0.762        | 0.479 |
| rs1465057        | chr12 | 51899148  | 0.804 | 0.625        | 0.794 |
| rs7302357        | chr12 | 52281805  | 0.223 | 0.182        | 0.639 |
| rs2406254        | chr12 | 85616797  | 0.907 | 0.377        | 0.284 |
| rs9527770        | chr13 | 57660493  | 0.663 | 0.572        | 0.911 |
| rs17115183       | chr14 | 29207158  | 0.299 | 0.320        | -     |
| rs7151113        | chr14 | 33232896  | 0.895 | 0.934        | 0.857 |
| rs213560         | chr14 | 77707744  | 0.751 | 0.430        | -     |
| rs8032707        | chr15 | 35572205  | 0.176 | 0.065        | 0.874 |
| rs2291278        | chr15 | 69902105  | 0.533 | 0.502        | 0.812 |
| <b>rs1834212</b> | chr15 | 93876557  | 0.063 | <b>0.047</b> | -     |
| rs716820         | chr17 | 47985581  | 0.495 | 0.236        | 0.767 |
| rs7238440        | chr18 | 21364727  | 0.782 | 0.205        | 0.174 |
| rs7226824        | chr18 | 25930825  | 0.674 | 0.658        | 0.810 |
| rs2426477        | chr20 | 51300670  | 0.768 | 0.934        | 0.673 |
| rs7261371        | chr20 | 57431233  | 0.306 | 0.306        | -     |
| rs11088247       | chr21 | 33525119  | 0.384 | 0.253        | 0.915 |
| rs6640615        | chrX  | 10107276  | 0.091 |              |       |
| rs1060063        | chrX  | 40350760  | 0.966 |              |       |
| rs3747440        | chrX  | 133134250 | 0.315 |              |       |
| rs306885         | chrX  | 154651506 | 0.596 |              |       |

---

*P* values for log-rank test

-, not calculated because the frequency of the rare homozygote was below 0.05

*P* < 0.05 is in boldface
